# Supplementary material for: Reviews and syntheses: measuring ecosystem nitrogen status – a comparison of proxies
Source: Copernicus journal article supplement (doi:10.5194/bg-13-5395-2016), 2016-09-28
Supplement: Supplementary file 1 [file Supplemental Data.xlsx]

## Sheet: SupplementalTable1.csv
Country	Site	Watershed	Region	Ecosystem	Latitude	Longitude	Elevation	Mean Annual Temperature	Mean Annual Precipitation	Nitrogen Deposition	Soil Depth	Lysimeter Depth	Mineralization Method	Foliar δ15N	Soil δ15N	Net Nitrification	Net N Mineralization	Soil Solution DIN:DON	Stream DIN:DON	References
							(m)	(oC)	(mm yr-1)	(kg N ha-1 yr-1)	(cm)	(cm)		(‰)	(‰)	(μg N g-1 d-1)	(μg N g-1 d-1)
Australia	Kakadu National Park	Howard River East catchment	tropical	grassland	12.39' S	132.55' E		27.5	1475		5			-0.4	3.6					1) Schmidt, S., & Stewart, G. R. (2003). δ15N values of tropical savanna and monsoon forest species reflect root specialisations and soil nitrogen status. Oecologia, 134(4), 569-577.
Belgium	Not specified	GE	temperate	forest				10.7	760	44	10		incubation			0.01	0.03			1) Vervaet, H., Massart, B., Boeckx, P., Van Cleemput, O., & Hofman, G. (2002). Use of principal component analysis to assess factors controlling net N mineralization in deciduous and coniferous forest soils. Biology and Fertility of Soils, 36(2), 93-101.
Belgium	Not specified	SB	temperate	forest				10.3	830	28	10		incubation			0	0.01			1) Vervaet, H., Massart, B., Boeckx, P., Van Cleemput, O., & Hofman, G. (2002). Use of principal component analysis to assess factors controlling net N mineralization in deciduous and coniferous forest soils. Biology and Fertility of Soils, 36(2), 93-101.
Borneo	Mount Kinabalu	7N WS	tropical	forest	6.05' N	160.33' E	650	23.9	2509		15			0.02	4.9					1) Kitayama, K., & Iwamoto, K. (2001). Patterns of natural 15N abundance in the leaf-to-soil continuum of tropical rain forests differing in N availability on Mount Kinabalu, Borneo. Plant and Soil, 229(2), 203-212.
Borneo	Mount Kinabalu	7U WS	tropical	forest	6.05' N	160.33' E	700	23.7	2509		15			-2	2.5					1) Kitayama, K., & Iwamoto, K. (2001). Patterns of natural 15N abundance in the leaf-to-soil continuum of tropical rain forests differing in N availability on Mount Kinabalu, Borneo. Plant and Soil, 229(2), 203-212.
Borneo	Mount Kinabalu	17N WS	tropical	forest	6.05' N	160.33' E	1560	18.9	2714		15			-3.7	-0.3					1) Kitayama, K., & Iwamoto, K. (2001). Patterns of natural 15N abundance in the leaf-to-soil continuum of tropical rain forests differing in N availability on Mount Kinabalu, Borneo. Plant and Soil, 229(2), 203-212.
Borneo	Mount Kinabalu	17U WS	tropical	forest	6.05' N	160.33' E	1860	17.3	2714		15			-6.2	-0.1					1) Kitayama, K., & Iwamoto, K. (2001). Patterns of natural 15N abundance in the leaf-to-soil continuum of tropical rain forests differing in N availability on Mount Kinabalu, Borneo. Plant and Soil, 229(2), 203-212.
Borneo	Mount Kinabalu	31&27 WS (4 sites in 1 WS)	tropical	forest	6.05' N	160.33' E	2835	11.95	2685		15			-4.13	1.5					1) Kitayama, K., & Iwamoto, K. (2001). Patterns of natural 15N abundance in the leaf-to-soil continuum of tropical rain forests differing in N availability on Mount Kinabalu, Borneo. Plant and Soil, 229(2), 203-212.
Brazil	Amazonias	Barro Branco catchment	tropical	forest	25.6' S	60.58' W		26	2000			>149						0.55	0.11	1) McClain, M. E., Richey, J. E., & Pimentel, T. P. (1994). Groundwater nitrogen dynamics at the terrestrial-lotic interface of a small catchment in the Central Amazon Basin. Biogeochemistry, 27(2), 113-127.
Brazil	Fazenda Nova Vida, Rondonia	WS pair 1/Fazenda Nova Vida, Retiro Aldeia, km 472 of BR-364, 50km SE of Ariquemes	tropical	forest	10.30' S	62.30' W	350	25.6	2200		5	100	lab incubation	8	10.95	1.65	1.51	0.53	0.37	1) Neill, C., Deegan, L. A., Thomas, S. M., & Cerri, C. C. (2001). Deforestation for pasture alters nitrogen and phosphorus in small Amazonian streams. Ecological Applications, 11(6), 1817-1828. 2) Piccolo, M. C., Neill, C., & Cerri, C. C. (1994). Natural abundance of 15N in soils along forest-to-pasture chronosequences in the western Brazilian Amazon Basin. Oecologia, 99(1-2), 112-117. 3) Piccol…
Brazil	Santare´m	Flona-2	tropical	forest	2.86' S	54.96' W		25	1909		10		lab incubation	5	8.91	2.32	0.3			1) Ometto, J. P., Ehleringer, J. R., Domingues, T. F., Berry, J. A., Ishida, F. Y., Mazzi, E., ... & Martinelli, L. A. (2006). The stable carbon and nitrogen isotopic composition of vegetation in tropical forests of the Amazon Basin, Brazil. Biogeochemistry, 79(1-2), 251-274. 2) Slilver, W. L., Thompson, A. W., McGroddy, M. E., Varner, R. E., Dias, J. D., Silva, H., Crill, P. M., & Keller, M., (2…
Brazil	Porto Velho	EMBRAPA experimental area 5 km SE of Porto Velho on BR-364	tropical	forest	8.47' S	63.52' W		25	2300		5		lab incubation		9.44	3.63	2.78			1) Piccolo, M. C., Neill, C., Melillo, J. M., Cerri, C. C., & Steudler, P. A. (1996). 15N natural abundance in forest and pasture soils of the Brazilian Amazon Basin. Plant and Soil, 182(2), 249-258. 2) Neill, C., Piccolo, M. C., Cerri, C. C., Steudler, P. A., Melillo, J. M., & Brito, M. (1997). Net nitrogen mineralization and net nitrification rates in soils following deforestation for pasture a…
Brazil	Jamari	Floresta Nacional do Jamari, 100 km SE of Porto Velho on BR-364	tropical	forest	9.11' S	63.07' W		22.3	2200		5		lab incubation		8.39	1.89	2.25			1) Piccolo, M. C., Neill, C., Melillo, J. M., Cerri, C. C., & Steudler, P. A. (1996). 15N natural abundance in forest and pasture soils of the Brazilian Amazon Basin. Plant and Soil, 182(2), 249-258. 2) Neill, C., Piccolo, M. C., Cerri, C. C., Steudler, P. A., Melillo, J. M., & Brito, M. (1997). Net nitrogen mineralization and net nitrification rates in soils following deforestation for pasture a…
Brazil	Cacaulfindia	Fazenda Rancho Grande, on Line road C-20, 6km from Line road-B 65,9 km NE of Cacaulfindia	tropical	forest	10.09' S	62.52' W		22.3	2200		5		lab incubation		10.44	2.61	2.63		0.15	1) Piccolo, M. C., Neill, C., Melillo, J. M., Cerri, C. C., & Steudler, P. A. (1996). 15N natural abundance in forest and pasture soils of the Brazilian Amazon Basin. Plant and Soil, 182(2), 249-258. 2) Neill, C., Piccolo, M. C., Cerri, C. C., Steudler, P. A., Melillo, J. M., & Brito, M. (1997). Net nitrogen mineralization and net nitrification rates in soils following deforestation for pasture a…
Brazil	Ouro Preto	Fazenda Benjamin, on Line road 4, 4 km N-NW of Ouro Preto do Oeste	tropical	forest	10.42' S	62.12' W		22.3	2200		5		lab incubation		10.27	2.03	1.47			1) Piccolo, M. C., Neill, C., Melillo, J. M., Cerri, C. C., & Steudler, P. A. (1996). 15N natural abundance in forest and pasture soils of the Brazilian Amazon Basin. Plant and Soil, 182(2), 249-258. 2) Neill, C., Piccolo, M. C., Cerri, C. C., Steudler, P. A., Melillo, J. M., & Brito, M. (1997). Net nitrogen mineralization and net nitrification rates in soils following deforestation for pasture a…
Brazil	Vilhena	On a side road, 3 km E of BR-363, 4 km on the Mato Grosso side of the MT/RO border	tropical	forest	12.52' S	60.03' W		19.55	2100		5		lab incubation		8.75	4.26	4.9			1) Piccolo, M. C., Neill, C., Melillo, J. M., Cerri, C. C., & Steudler, P. A. (1996). 15N natural abundance in forest and pasture soils of the Brazilian Amazon Basin. Plant and Soil, 182(2), 249-258. 2) Neill, C., Piccolo, M. C., Cerri, C. C., Steudler, P. A., Melillo, J. M., & Brito, M. (1997). Net nitrogen mineralization and net nitrification rates in soils following deforestation for pasture a…
Canada	Dawson Creek, BC	OM1C0	boreal	forest	55.58' N	120.28' W	720	1.6	482		10		in situ intact soil core incubation	-2.26		-0.004	0.003			1) Tan, X., Kabzems, R., & Chang, S. X. (2006). Response of forest vegetation and foliar δ 13 C and δ 15 N to soil compaction and forest floor removal in a boreal aspen forest. Forest Ecology and Management, 222(1), 450-458.
Canada	Experimental Lakes Area	Lamontage Forest Islands	temperate	forest	49.30' N	93.30' W	370	2.3	673	3.71	10		buried-bag incubations	-4.57	4.9	0	0.08			1) Lamontagne, S., Schiff, S. L., & Elgood, R. J. (2000). Recovery of 15N-labelled nitrate applied to a small upland boreal forest catchment. Canadian Journal of Forest Research, 30(7), 1165-1177. 2) Lamontagne, S. (1998). Nitrogen mineralization in upland Precambrian Shield catchments: contrasting the role of lichen-covered bedrock and forested areas. Biogeochemistry, 41(1), 53-69.
Canada	Algoma District, ON	Turkey Lakes Watershed	temperate	forest	47.03′ N	84.25′ W	357	3.5	1225	7.02	10	30	in situ incubation			0.26	0.51	0.61		1) Foster, N., Spoelstra, J., Hazlett, P., Schiff, S., Beall, F., Creed, I., & David, C. (2005). Heterogeneity in soil nitrogen within first-order forested catchments at the Turkey Lakes Watershed. Canadian journal of forest research, 35(4), 797-805.
Canada	Toranto, ON	South slope of the Oak Ridges morain	temperate	forest	43.47' N	79.15' W	307	8	760		8		incubation			0.02	0.02			1) Hill, A. R., & Shackleton, M. (1989). Soil N mineralization and nitrification in relation to nitrogen solution chemistry in a small forested watershed. Biogeochemistry, 8(2), 167-184.
Canada	Vancouver Island, BC	Warn Bay Creek	temperate	forest	49.15'46.14" N	125.43'31.6" W		10	2500		10			2.38	3.8					1) Reimchen, T. E., Mathewson, D. D., Hocking, M. D., Moran, J., & Harris, D. (2003). Isotopic evidence for enrichment of salmon-derived nutrients in vegetation, soil, and insects in riparian zones in coastal British Columbia. In American Fisheries Society Symposium (pp. 59-70). American Fisheries Society.
Canada	Vancouver Island, BC	Bulson Creek	temperate	forest	49.15'48.8" N	125.43'40.79" W		10	2500		10			-0.52	4.8					1) Reimchen, T. E., Mathewson, D. D., Hocking, M. D., Moran, J., & Harris, D. (2003). Isotopic evidence for enrichment of salmon-derived nutrients in vegetation, soil, and insects in riparian zones in coastal British Columbia. In American Fisheries Society Symposium (pp. 59-70). American Fisheries Society.
Canada	Vancouver Island, BC	Moyeha River	temperate	forest	49.24'58.62" N	125.54'45.87" W		10	2500		10			1.21	1.57					1) Reimchen, T. E., Mathewson, D. D., Hocking, M. D., Moran, J., & Harris, D. (2003). Isotopic evidence for enrichment of salmon-derived nutrients in vegetation, soil, and insects in riparian zones in coastal British Columbia. In American Fisheries Society Symposium (pp. 59-70). American Fisheries Society.
Canada	Vancouver Island, BC	Megin River	temperate	forest	49.26'12.20" N	126.5'5.40" W		10	2500		10			-0.28	3.79					1) Reimchen, T. E., Mathewson, D. D., Hocking, M. D., Moran, J., & Harris, D. (2003). Isotopic evidence for enrichment of salmon-derived nutrients in vegetation, soil, and insects in riparian zones in coastal British Columbia. In American Fisheries Society Symposium (pp. 59-70). American Fisheries Society.
Canada	Vancouver Island, BC	Watta Creek	temperate	forest	49.27'29.42" N	126.1'38.77" W		10	2500		10			1.19	2.15					1) Reimchen, T. E., Mathewson, D. D., Hocking, M. D., Moran, J., & Harris, D. (2003). Isotopic evidence for enrichment of salmon-derived nutrients in vegetation, soil, and insects in riparian zones in coastal British Columbia. In American Fisheries Society Symposium (pp. 59-70). American Fisheries Society.
Canada	Vancouver Island, BC	Sidney River	temperate	forest	49.30'47.71" N	126.17'48.28" W		10	2500		10			-0.98	-0.03					1) Reimchen, T. E., Mathewson, D. D., Hocking, M. D., Moran, J., & Harris, D. (2003). Isotopic evidence for enrichment of salmon-derived nutrients in vegetation, soil, and insects in riparian zones in coastal British Columbia. In American Fisheries Society Symposium (pp. 59-70). American Fisheries Society.
China	Dinghushan Biosphere Reserve	Not specified	tropical	forest	23.10′ N	112.10′ E		21	1927	51	10		in situ intact soil core incubation	-3.15	2.84	0.01	0.02	2.29		1) Fang, Y. T., Gundersen, P., Mo, J. M., & Zhu, W. X. (2008). Input and output of dissolved organic and inorganic nitrogen in subtropical forests of South China under high air pollution. Biogeosciences, 5(2), 339-352. 2) Fang, H., Yu, G., Cheng, S., Zhu, T., Zheng, J., Mo, J., ... & Luo, Y. (2011). Nitrogen-15 signals of leaf-litter-soil continuum as a possible indicator of ecosystem nitrogen sa…
Costa Rica	Earth	Not specified	tropical	forest			650	25	4500		10		lab incubation	2.16		4.28	3.27			1) Alvarez-Claire, S. and Mack, M.C. (2011). Influence of Precipitation on Soil and Foliar Nutrients Across Nine Costa Rican Forests. Biotropica, 43(4), 433-441
Costa Rica	Mogos	Not specified	tropical	forest			650	25	4500		10		lab incubation	-0.75		4.9	3.76			1) Alvarez-Claire, S. and Mack, M.C. (2011). Influence of Precipitation on Soil and Foliar Nutrients Across Nine Costa Rican Forests. Biotropica, 43(4), 433-442
Costa Rica	La Palma	Not specified	tropical	forest			650	25	4500		10		lab incubation	-1.51		1.88	0.59			1) Alvarez-Claire, S. and Mack, M.C. (2011). Influence of Precipitation on Soil and Foliar Nutrients Across Nine Costa Rican Forests. Biotropica, 43(4), 433-443
Costa Rica	Mastatal	Not specified	tropical	forest			650	25	4500		10		lab incubation	0.16		3.71	3.19			1) Alvarez-Claire, S. and Mack, M.C. (2011). Influence of Precipitation on Soil and Foliar Nutrients Across Nine Costa Rican Forests. Biotropica, 43(4), 433-444
Costa Rica	Dos Brazos	Not specified	tropical	forest			650	25	4500		10		lab incubation	-0.82		2.61	0.89			1) Alvarez-Claire, S. and Mack, M.C. (2011). Influence of Precipitation on Soil and Foliar Nutrients Across Nine Costa Rican Forests. Biotropica, 43(4), 433-445
Costa Rica	San Ramon	Not specified	tropical	forest			650	25	4500		10		lab incubation	-0.46		3.17	2.69			1) Alvarez-Claire, S. and Mack, M.C. (2011). Influence of Precipitation on Soil and Foliar Nutrients Across Nine Costa Rican Forests. Biotropica, 43(4), 433-446
Costa Rica	Tapanti	Not specified	tropical	forest			650	25	4500		10		lab incubation	-2.6		1.96	3.03			1) Alvarez-Claire, S. and Mack, M.C. (2011). Influence of Precipitation on Soil and Foliar Nutrients Across Nine Costa Rican Forests. Biotropica, 43(4), 433-447
Costa Rica	Golfito	Not specified	tropical	forest			650	25	4500		10		lab incubation			1.84	0.77			1) Alvarez-Claire, S. and Mack, M.C. (2011). Influence of Precipitation on Soil and Foliar Nutrients Across Nine Costa Rican Forests. Biotropica, 43(4), 433-448
Costa Rica	Las Cruces	Not specified	tropical	forest				25	4500						3.75				0.85	1) Taylor and Porder (personal communication)
Costa Rica	Osa	Piro	tropical	forest				25	4500						6				0.34	1) Taylor and Porder (personal communication)
Costa Rica	Osa	Drake	tropical	forest	8.43' N	83.37' W		25	5000		10		incubation		4.04	0	0		0.11	1) Wieder, W. R., Cleveland, C. C., & Townsend, A. R. (2011). Throughfall exclusion and leaf litter addition drive higher rates of soil nitrous oxide emissions from a lowland wet tropical forest. Global Change Biology, 17(10), 3195-3207. 2) Taylor and Porder (personal communication).
Costa Rica	La Selva	CARBONO plots/Salto and Pantano rivers	tropical	forest	10.26' N	83.59' W	92.5	24.6	4200		10	150	lab incubation	2.86	5.77	3.33	2.53	9		1) Huang, C. Y., Tully, K. L., Clark, D. A., Oberbauer, S. F., & McGlynn, T. P. (2012). The δ 15 N signature of the detrital food web tracks a landscape-scale soil phosphorus gradient in a Costa Rican lowland tropical rain forest. Journal of Tropical Ecology, 28(04), 395-403. 2) Duff, J. H., Pringle, C. M., & Triska, F. J. (1996). Nitrate reduction in sediments of lowland tropical streams drainin…
Czech Republic	Nacetin	CANIF sites	temperate	forest	50.35' N	13.15' E	775	5.9	935	18.6	10	90	lab incubation			0.0240855	0.0270962			1) Schulze, E.D., 2000. The carbon and nitrogen cycle of forest ecosystems (pp. 3-13). Springer Berlin Heidelberg.
Czech Republic	Jezeri	CANIF sites	temperate	forest	50.33' N	13.28' E	750	5.9	935	20.9	10	90	lab incubation			0.0432588	0.0432588			1) Schulze, E.D., 2000. The carbon and nitrogen cycle of forest ecosystems (pp. 3-13). Springer Berlin Heidelberg.
Denmark	Gribskov	CANIF sites	temperate	forest	55.58' N	12.15' E	45	7.5	632	11.6	10	90	lab incubation	-6.21	-5.59			0.37931		1) Schulze, E.D., 2000. The carbon and nitrogen cycle of forest ecosystems (pp. 3-13). Springer Berlin Heidelberg.
Denmark	Klosterhede	NITREX sites	temperate	forest	56.29' N	8.24' E	27	9	860	17.5	F and H-horizons	below rooting zone	lab incubation	-4.19	4.3	0	0.028342	0.4		1) Gundersen, P., Emmett, B. A., Kjønaas, O. J., Koopmans, C. J., & Tietema, A. (1998). Impact of nitrogen deposition on nitrogen cycling in forests: a synthesis of NITREX data. Forest Ecology and management, 101(1), 37-55. 2) Gundersen, P. (1998). Effects of enhanced nitrogen deposition in a spruce forest at Klosterhede, Denmark, examined by moderate NH 4 NO 3 addition. Forest Ecology and Manage…
Ecuador	souther Andes	MC1	tropical	forest	4.00' S	79.05' W	2050	15.5	2448		Ah horizon (Oa for N min)	33			6.98			0.2	2.8	1) Goller, R., Wilcke, W., Fleischbein, K., Valarezo, C., & Zech, W. (2006). Dissolved nitrogen, phosphorus, and sulfur forms in the ecosystem fluxes of a montane forest in Ecuador. Biogeochemistry, 77(1), 57-89. 2) Wilcke, W., Yasin, S., Abramowski, U., Valarezo, C., & Zech, W. (2002). Nutrient storage and turnover in organic layers under tropical montane rain forest in Ecuador. European Journal…
Ecuador	souther Andes	MC2	tropical	forest	4.00' S	79.05' W	2050	15.5	2448		Ah horizon (Oa for N min)	33			5.62			1.57	1.64	1) Goller, R., Wilcke, W., Fleischbein, K., Valarezo, C., & Zech, W. (2006). Dissolved nitrogen, phosphorus, and sulfur forms in the ecosystem fluxes of a montane forest in Ecuador. Biogeochemistry, 77(1), 57-89. 2) Wilcke, W., Yasin, S., Abramowski, U., Valarezo, C., & Zech, W. (2002). Nutrient storage and turnover in organic layers under tropical montane rain forest in Ecuador. European Journal…
Ecuador	souther Andes	MC3	tropical	forest	4.00' S	79.05' W	2050	15.5	2448		Ah horizon (Oa for N min)	33			7.12			0.95	0.62	1) Goller, R., Wilcke, W., Fleischbein, K., Valarezo, C., & Zech, W. (2006). Dissolved nitrogen, phosphorus, and sulfur forms in the ecosystem fluxes of a montane forest in Ecuador. Biogeochemistry, 77(1), 57-89. 2) Wilcke, W., Yasin, S., Abramowski, U., Valarezo, C., & Zech, W. (2002). Nutrient storage and turnover in organic layers under tropical montane rain forest in Ecuador. European Journal…
Findland	Hyytiälä Forestry Field Station	Not specified	boreal	forest	61.48' N	24.19' E	150	3	709	6	5-10			-4.89	2.12					1) Sah, S. P. (2005). Isotope ratios and concentration of N in needles, roots and soils of Norway spruce (Picea abies [L.] Karst.) stands as influenced by atmospheric deposition of N. Journal of Forest Science, 51(10), 468-475.
Frace	Aubure F	CANIF sites	temperate	forest	48.12' N	7.11' E	1000	5.4	1192	14.7	10	90	lab incubation	-4.51	2.93					1) Schulze, E.D., 2000. The carbon and nitrogen cycle of forest ecosystems (pp. 3-13). Springer Berlin Heidelberg.
Frace	Aubure P90	CANIF sites	temperate	forest	48.12' N	7.11' E	1050	5.4	1192	14.7	10	90	lab incubation	-2.96	-3.11	0.030137	0.0493151			1) Schulze, E.D., 2000. The carbon and nitrogen cycle of forest ecosystems (pp. 3-13). Springer Berlin Heidelberg.
Frace	Thezan	CANIF sites	temperate	forest	43.07' N	2.45' E	170	15.4	787		10	90	lab incubation	-3.52	-6.1			2.5		1) Schulze, E.D., 2000. The carbon and nitrogen cycle of forest ecosystems (pp. 3-13). Springer Berlin Heidelberg.
Germany	Bavaria	Fichtelgebirge	temperate	forest				5.3	1160	22	A5-15 horizon			-3	4					1) Gebauer, G., & Schulze, E. D. (1991). Carbon and nitrogen isotope ratios in different compartments of a healthy and a declining Picea abies forest in the Fichtelgebirge, NE Bavaria. Oecologia, 87(2), 198-207.
Germany	Solling	Weser river mountain range	temperate	forest	51.46' N	9.34' E	504	6.1	1142	37.8	11			0.02	3.94					1) Sah, S. P., & Brumme, R. (2003). Natural 15N abundance in two nitrogen saturated forest ecosystems at Solling, Germany. J For Sci, 49(11), 515-522. 2) Borken, W., Xu, Y. J., & Beese, F. (2004). Ammonium, nitrate and dissolved organic nitrogen in seepage water as affected by compost amendment to European beech, Norway spruce, and Scots pine forests. Plant and Soil, 258(1), 121-134. 3) Tietema, …
Germany	Schacht	CANIF sites	temperate	forest	50.04' N	11.50' E	850	5.5	890	20.1	10	90	lab incubation	-4	-2.26	0.201602	0.237788	1.5		1) Schulze, E.D., 2000. The carbon and nitrogen cycle of forest ecosystems (pp. 3-13). Springer Berlin Heidelberg.
Germany	Thu¨ringer Schiefergebirge	Sieglitzbach	temperate	grassland			670	5	1000		10		in situ incubation		5.24	1.28	1.18			1) Kahmen, A., Wanek, W., & Buchmann, N. (2008). Foliar δ15N values characterize soil N cycling and reflect nitrate or ammonium preference of plants along a temperate grassland gradient. Oecologia, 156(4), 861-870.
Germany	Thu¨ringer Schiefergebirge	Koselbach	temperate	grassland			670	5	1000		10		in situ incubation		5.26	1.28	1.12			1) Kahmen, A., Wanek, W., & Buchmann, N. (2008). Foliar δ15N values characterize soil N cycling and reflect nitrate or ammonium preference of plants along a temperate grassland gradient. Oecologia, 156(4), 861-870.
Germany	Thu¨ringer Schiefergebirge	Lutzbach	temperate	grassland			670	5	1000		10		in situ incubation		5.13	1.4	1.08			1) Kahmen, A., Wanek, W., & Buchmann, N. (2008). Foliar δ15N values characterize soil N cycling and reflect nitrate or ammonium preference of plants along a temperate grassland gradient. Oecologia, 156(4), 861-870.
Germany	Thu¨ringer Schiefergebirge	Sormitz	temperate	grassland			670	5	1000		10		in situ incubation		5.36	1.22	1.09			1) Kahmen, A., Wanek, W., & Buchmann, N. (2008). Foliar δ15N values characterize soil N cycling and reflect nitrate or ammonium preference of plants along a temperate grassland gradient. Oecologia, 156(4), 861-870.
Germany	Thu¨ringer Schiefergebirge	Reichebach	temperate	grassland			670	5	1000		10		in situ incubation		6.12	1.35	1.24			1) Kahmen, A., Wanek, W., & Buchmann, N. (2008). Foliar δ15N values characterize soil N cycling and reflect nitrate or ammonium preference of plants along a temperate grassland gradient. Oecologia, 156(4), 861-870.
Germany	Thu¨ringer Schiefergebirge	Grumbacherbach	temperate	grassland			670	5	1000		10		in situ incubation		3.9	0.82	0.65			1) Kahmen, A., Wanek, W., & Buchmann, N. (2008). Foliar δ15N values characterize soil N cycling and reflect nitrate or ammonium preference of plants along a temperate grassland gradient. Oecologia, 156(4), 861-870.
Germany	Thu¨ringer Schiefergebirge	Dober	temperate	grassland			670	5	1000		10		in situ incubation		3.39	0.87	0.74			1) Kahmen, A., Wanek, W., & Buchmann, N. (2008). Foliar δ15N values characterize soil N cycling and reflect nitrate or ammonium preference of plants along a temperate grassland gradient. Oecologia, 156(4), 861-870.
Germany	Thu¨ringer Schiefergebirge	Gumpel	temperate	grassland			670	5	1000		10		in situ incubation		3.67	0.08	0.3			1) Kahmen, A., Wanek, W., & Buchmann, N. (2008). Foliar δ15N values characterize soil N cycling and reflect nitrate or ammonium preference of plants along a temperate grassland gradient. Oecologia, 156(4), 861-870.
Germany	Thu¨ringer Schiefergebirge	Teuschmitz	temperate	grassland			670	5	1000		10		in situ incubation		4.49	0.75	1.02			1) Kahmen, A., Wanek, W., & Buchmann, N. (2008). Foliar δ15N values characterize soil N cycling and reflect nitrate or ammonium preference of plants along a temperate grassland gradient. Oecologia, 156(4), 861-870.
Germany	Thu¨ringer Schiefergebirge	Laurenhainerbach	temperate	grassland			670	5	1000		10		in situ incubation		4.54	0.75	0.79			1) Kahmen, A., Wanek, W., & Buchmann, N. (2008). Foliar δ15N values characterize soil N cycling and reflect nitrate or ammonium preference of plants along a temperate grassland gradient. Oecologia, 156(4), 861-870.
Germany	Thu¨ringer Schiefergebirge	Dammerbach/Steinbach	temperate	grassland			670	5	1000		10		in situ incubation		4.53	0.6	0.54			1) Kahmen, A., Wanek, W., & Buchmann, N. (2008). Foliar δ15N values characterize soil N cycling and reflect nitrate or ammonium preference of plants along a temperate grassland gradient. Oecologia, 156(4), 861-870.
Germany	Thu¨ringer Schiefergebirge	Olschnitz	temperate	grassland			670	5	1000		10		in situ incubation		5.16	0.81	0.68			1) Kahmen, A., Wanek, W., & Buchmann, N. (2008). Foliar δ15N values characterize soil N cycling and reflect nitrate or ammonium preference of plants along a temperate grassland gradient. Oecologia, 156(4), 861-870.
Germany	Thu¨ringer Schiefergebirge	Trogenbach	temperate	grassland			670	5	1000		10		in situ incubation		4.02	0.21	0.28			1) Kahmen, A., Wanek, W., & Buchmann, N. (2008). Foliar δ15N values characterize soil N cycling and reflect nitrate or ammonium preference of plants along a temperate grassland gradient. Oecologia, 156(4), 861-870.
Germany	Thu¨ringer Schiefergebirge	Tettau	temperate	grassland			670	5	1000		10		in situ incubation		4.05	0.18	0.64			1) Kahmen, A., Wanek, W., & Buchmann, N. (2008). Foliar δ15N values characterize soil N cycling and reflect nitrate or ammonium preference of plants along a temperate grassland gradient. Oecologia, 156(4), 861-870.
Germany	Waldstein	CANIF sites	temperate	forest	50.12' N	11.53' E	700	5.5	890	20.1	10	90	lab incubation	-2.49	-3.83	0.0692141	0.0836337	5.62		1) Schulze, E.D., 2000. The carbon and nitrogen cycle of forest ecosystems (pp. 3-13). Springer Berlin Heidelberg.
Italy	Collelongo	CANIF sites	temperate	forest	41.52' N	13.38' E	1560	6.4	1109	10.8	10	90	lab incubation	-3.8	-2.08	0.0636502	0.083022	2.69231		1) Schulze, E.D., 2000. The carbon and nitrogen cycle of forest ecosystems (pp. 3-13). Springer Berlin Heidelberg.
Italy	Monte di Mezza	CANIF sites	temperate	forest	41.45' N	14.53' E	905	8.5	1032		10	90	lab incubation	4.4	4.6			14.2333		1) Schulze, E.D., 2000. The carbon and nitrogen cycle of forest ecosystems (pp. 3-13). Springer Berlin Heidelberg.
Jamaica	Blue Mountains	Pmull and Mmor	tropical	forest	18.05'29" N	77.38'57" W	1817	24	2275		10		in situ intact soil core incubation			0.28	3.84			1) Hafkenscheid, R. L. (2000). Hydrology and biogeochemistry of tropical montane rain forests of contrasting stature in the Blue Mountains, Jamaica (Doctoral dissertation, Vrije Universiteit, Amsterdam).
Netherlands	Speuld	NITREX sites	temperate	forest	52.13' N	5.39' E	50	9.3	800	50	10	below rooting zone	buried-bag incubation	-4.86	-0.96	0.01	0.01	23.25		1) Gundersen, P., Emmett, B. A., Kjønaas, O. J., Koopmans, C. J., & Tietema, A. (1998). Impact of nitrogen deposition on nitrogen cycling in forests: a synthesis of NITREX data. Forest Ecology and management, 101(1), 37-55. 2) Emmett, B. A., Kjønaas, O. J., Gundersen, P., Koopmans, C., Tietema, A., & Sleep, D. (1998). Natural abundance of 15 N in forests across a nitrogen deposition gradient. For…
Netherlands	Ysselsteyn	NITREX sites	temperate	forest	51.30' N	5.55' E	30	9.3	700	58	10	below rooting zone	buried-bag incubation	-2.37	-1.94	0	0.03	4.34		1) Gundersen, P., Emmett, B. A., Kjønaas, O. J., Koopmans, C. J., & Tietema, A. (1998). Impact of nitrogen deposition on nitrogen cycling in forests: a synthesis of NITREX data. Forest Ecology and management, 101(1), 37-55. 2) Emmett, B. A., Kjønaas, O. J., Gundersen, P., Koopmans, C., Tietema, A., & Sleep, D. (1998). Natural abundance of 15 N in forests across a nitrogen deposition gradient. For…
Peru	Yanachaga-Chemillen National Park	Wara	tropical	forest	10.32'45.9" S	75.31'28.4" W	2414	13.7	2502		mineral soil	50-80		-1.9	0.9			0.01	0.21	1) Saunders, T. J., McClain, M. E., and Llerena, C. A. (2006). The biogeochemistry of dissolved nitrogen, phosphorus, and organic carbon along terrestrial-aquatic flowpaths of a montane headwater catchment in the Peruvian Amazon. Hydrological Processes, 20(12), 2549-2562. 2) Townsend-Small, A. (2008). Carbon and nitrogen cycling in the Peruvian Andean Amazon. ProQuest.
Russia	Northwest Caucasus	Mt. Malaya Khatipara, Teberda Reserve	boreal	grassland	43.27' N	41.41' E	2725	-1.2	1400		Ah horizon		field incubation	-0.55	4.23	0.02	0.06			1) Makarov, M. I., Glaser, B., Zech, W., Malysheva, T. I., Bulatnikova, I. V., & Volkov, A. V. (2003). Nitrogen dynamics in alpine ecosystems of the northern Caucasus. Plant and Soil, 256(2), 389-402.
Scottland	Tay Estuary	Not specified	temperate	grassland	56. N	3. W		9	780		10			0.55	4.12					1) Handley and Scrimgeour (1997). Terrestrial Plant Ecology and 15N Natural Abundance: The Present Limits to Interpretation for Uncultivated Systems with Original Data from a Scottish Old Field. Advances in ecological research, 27, 133.
Spain	Sierra de las Nieves	Yunquera	temperate	forest	36.43'31" N	4.57'52" E	1170	13.5	1500	4.9	20	20	incubation		3.41	1.2	1.5	1.92		1) Carreira, J. A., Viñegla, B., Blanes, M. C., & García-Ruiz, R. (2010). Stable isotopes and changing paradigms on soil nitrogen and carbon biogeochemistry. Ecosistemas, 19(3), 14-23. 2) Torres-Cañabate, P., Davidson, E. A., Bulygina, E., García-Ruiz, R., & Carreira, J. A. (2008). Abiotic immobilization of nitrate in two soils of relic Abies pinsapo-fir forests under Mediterranean climate. Bioge…
Spain	Malaga	Sierra Bermeja	temperate	forest	36.29' 26" N	5.12' 7" E	1300	13.5	1500	9.1	20	20	incubation		0.83	2.25	2.3	1.95		1) Carreira, J. A., Viñegla, B., Blanes, M. C., & García-Ruiz, R. (2010). Stable isotopes and changing paradigms on soil nitrogen and carbon biogeochemistry. Ecosistemas, 19(3), 14-23. 2) Torres-Cañabate, P., Davidson, E. A., Bulygina, E., García-Ruiz, R., & Carreira, J. A. (2008). Abiotic immobilization of nitrate in two soils of relic Abies pinsapo-fir forests under Mediterranean climate. Bioge…
Sweden	Abisko	Heath sites	boreal	grassland			450	0.7	310		5		incubation	-5.27	-0.07					1) Michelsen, A., Schmidt, I. K., Jonasson, S., Quarmby, C., & Sleep, D. (1996). Leaf 15N abundance of subarctic plants provides field evidence that ericoid, ectomycorrhizal and non-and arbuscular mycorrhizal species access different sources of soil nitrogen. Oecologia, 105(1), 53-63. 2) Jonasson, S., Havström, M., Jensen, M., & Callaghan, T. V. (1993). In situ mineralization of nitorgen and phos…
Sweden	Aheden	CANIF sites	boreal	forest	64.13' N	19.30' E	175	1	588	1.7	10	90	lab incubation	-5.22	1.05	0	0	5		1) Schulze, E.D., 2000. The carbon and nitrogen cycle of forest ecosystems (pp. 3-13). Springer Berlin Heidelberg.
Sweden	Nyby	Not specified	boreal	forest	64.20' N	18.27' S	370			5	H horizon			-1.99	0.71					1) Johannisson, C., & Högberg, P. (1994). 15N abundance of soils and plants along an experimentally induced forest nitrogen supply gradient. Oecologia, 97(3), 322-325.
Sweden	Gardsjon	NITREX sites	boreal	forest	58.04' N	12.01' E		6.4	1100	10	F and H horizons	below rooting zone	lab incubation		5.4	0	0.128	0.18	0.17	1) Gundersen, P., Emmett, B. A., Kjønaas, O. J., Koopmans, C. J., & Tietema, A. (1998). Impact of nitrogen deposition on nitrogen cycling in forests: a synthesis of NITREX data. Forest Ecology and management, 101(1), 37-55. 2) Tietema, A. (1998). Microbial carbon and nitrogen dynamics in coniferous forest floor material collected along a European nitrogen deposition gradient. Forest Ecology and M…
Sweden	Skogaby	CANIF sites	temperate	forest	56.33' N	13.13' E	105	7.6	1237	16.4	10	90	lab incubation	-3.57	-1.35					1) Schulze, E.D., 2000. The carbon and nitrogen cycle of forest ecosystems (pp. 3-13). Springer Berlin Heidelberg.
Switzerland	Alptal	Erlenbach headwater catchment (NITREX)	temperate	grassland	47.03' N	8.43' E		6	2300	18	5	100	in situ incubation					0.55	0.73	1) Frank, H., Patrick, S., Peter, W., & Hannes, F. (2000). Export of dissolved organic carbon and nitrogen from Gleysol dominated catchments–the significance of water flow paths. Biogeochemistry, 50(2), 137-161. 2) Hagedorn, F., Bucher, J. B., & Schleppi, P. (2001). Contrasting dynamics of dissolved inorganic and organic nitrogen in soil and surface waters of forested catchments with Gleysols. Ge…
Thailand	Khun Sathan, Na Noi	Not specified	tropical	forest	17.48′ N	100.35′ E	1425	25	1400	4.2		80						3.84	0.36	1) Möller, A., Kaiser, K., & Guggenberger, G. (2005). Dissolved organic carbon and nitrogen in precipitation, throughfall, soil solution, and stream water of the tropical highlands in northern Thailand. Journal of Plant Nutrition and Soil Science, 168(5), 649-659.
UK	Moor House National Nature Reserve	Cottage Hill Sike (sub-catchement of trout beck)	temperate	grassland			562.5	5.3	1882	21		50						1.09	0.11	1) Adamson, J. K., Scott, W. A., & Rowland, A. P. (1998). The dynamics of dissolved nitrogen in a blanket peat dominated catchment. Environmental Pollution, 99(1), 69-77.
Wales	Aber	NITREX sites	temperate	forest	53.13' N	4.00' W		8.8	1850	15	10	below rooting zone	buried-bag incubations	4	5.35	0.02	0.04	11.25		1) Gundersen, P., Emmett, B. A., Kjønaas, O. J., Koopmans, C. J., & Tietema, A. (1998). Impact of nitrogen deposition on nitrogen cycling in forests: a synthesis of NITREX data. Forest Ecology and management, 101(1), 37-55. 2) Emmett, B. A., Kjønaas, O. J., Gundersen, P., Koopmans, C., Tietema, A., & Sleep, D. (1998). Natural abundance of 15 N in forests across a nitrogen deposition gradient. For…
USA	Thurston, HI	Long Substrate Age Gradient	tropical	forest			1176	16	2500	17	15		incubation	-8.05	1.45	0	0			1) Hedin, L. O., Vitousek, P. M., & Matson, P. A. (2003). Nutrient losses over four million years of tropical forest development. Ecology, 84(9), 2231-2255. 2) Martinelli, L. A., Piccolo, M. C., Townsend, A. R., Vitousek, P. M., Cuevas, E., McDowell, W., ... & Treseder, K. (1999). Nitrogen stable isotopic composition of leaves and soil: tropical versus temperate forests. In New Perspectives on Ni…
USA	Olaa, HI	Long Substrate Age Gradient	tropical	forest			1200	16	2500	17	15		incubation	-5.45	-0.64	0.03	0.23			1) Hedin, L. O., Vitousek, P. M., & Matson, P. A. (2003). Nutrient losses over four million years of tropical forest development. Ecology, 84(9), 2231-2255. 2) Martinelli, L. A., Piccolo, M. C., Townsend, A. R., Vitousek, P. M., Cuevas, E., McDowell, W., ... & Treseder, K. (1999). Nitrogen stable isotopic composition of leaves and soil: tropical versus temperate forests. In New Perspectives on Ni…
USA	Laupahoehoe, HI	Long Substrate Age Gradient	tropical	forest			1170	16	2500	17	15	32	incubation	0.8	6.27	4.75	4.19	3.59		1) Hedin, L. O., Vitousek, P. M., & Matson, P. A. (2003). Nutrient losses over four million years of tropical forest development. Ecology, 84(9), 2231-2255. 2) Martinelli, L. A., Piccolo, M. C., Townsend, A. R., Vitousek, P. M., Cuevas, E., McDowell, W., ... & Treseder, K. (1999). Nitrogen stable isotopic composition of leaves and soil: tropical versus temperate forests. In New Perspectives on Ni…
USA	Kohala, HI	Long Substrate Age Gradient	tropical	forest			1122	16	2500	17	15	36	incubation	-2.95	4.78	2.76	2.36	1.99		1) Hedin, L. O., Vitousek, P. M., & Matson, P. A. (2003). Nutrient losses over four million years of tropical forest development. Ecology, 84(9), 2231-2255. 2) Martinelli, L. A., Piccolo, M. C., Townsend, A. R., Vitousek, P. M., Cuevas, E., McDowell, W., ... & Treseder, K. (1999). Nitrogen stable isotopic composition of leaves and soil: tropical versus temperate forests. In New Perspectives on Ni…
USA	Kolekole, HI	Long Substrate Age Gradient	tropical	forest			1210	16	2500	17	15		incubation	-1.8	4.7	1.65	1.59			1) Hedin, L. O., Vitousek, P. M., & Matson, P. A. (2003). Nutrient losses over four million years of tropical forest development. Ecology, 84(9), 2231-2255. 2) Martinelli, L. A., Piccolo, M. C., Townsend, A. R., Vitousek, P. M., Cuevas, E., McDowell, W., ... & Treseder, K. (1999). Nitrogen stable isotopic composition of leaves and soil: tropical versus temperate forests. In New Perspectives on Ni…
USA	Kokee, HI	Long Substrate Age Gradient	tropical	forest			1134	16	2500	17	15	35	incubation	-0.9	5.22	2.34	3.05	2.26		1) Hedin, L. O., Vitousek, P. M., & Matson, P. A. (2003). Nutrient losses over four million years of tropical forest development. Ecology, 84(9), 2231-2255. 2) Martinelli, L. A., Piccolo, M. C., Townsend, A. R., Vitousek, P. M., Cuevas, E., McDowell, W., ... & Treseder, K. (1999). Nitrogen stable isotopic composition of leaves and soil: tropical versus temperate forests. In New Perspectives on Ni…
USA	Maui, HI	Rainfall gradient (220 mm)	tropical	forest			2200	16	2200	17	15	35		2.4	5.17			1.25		1) Brookshire, E. N. J., Gerber, S., Menge, D. N., & Hedin, L. O. (2012). Large losses of inorganic nitrogen from tropical rainforests suggest a lack of nitrogen limitation. Ecology letters, 15(1), 9-16. 2) Houlton et al. 2007 A climate-driven switch in plant nitrogen acquisition within tropical forest communities. 3) Bai, E., and Houlton, B. Z. (2009). Coupled isotopic and process-based modeling…
USA	Maui, HI	Rainfall gradient (245 mm)	tropical	forest			2450	16	2450	17	15	35		0.86	4.49			0.82		1) Brookshire, E. N. J., Gerber, S., Menge, D. N., & Hedin, L. O. (2012). Large losses of inorganic nitrogen from tropical rainforests suggest a lack of nitrogen limitation. Ecology letters, 15(1), 9-16. 2) Houlton et al. 2007 A climate-driven switch in plant nitrogen acquisition within tropical forest communities. 3) Bai, E., and Houlton, B. Z. (2009). Coupled isotopic and process-based modeling…
USA	Maui, HI	Rainfall gradient (275 mm)	tropical	forest			2750	16	2750	17	15	35		-0.04	5.62			0.98		1) Brookshire, E. N. J., Gerber, S., Menge, D. N., & Hedin, L. O. (2012). Large losses of inorganic nitrogen from tropical rainforests suggest a lack of nitrogen limitation. Ecology letters, 15(1), 9-16. 2) Houlton et al. 2007 A climate-driven switch in plant nitrogen acquisition within tropical forest communities. 3) Bai, E., and Houlton, B. Z. (2009). Coupled isotopic and process-based modeling…
USA	Maui, HI	Rainfall gradient (335 mm)	tropical	forest			3350	16	3350	17	15	35		0.07	6.29			1.05		1) Brookshire, E. N. J., Gerber, S., Menge, D. N., & Hedin, L. O. (2012). Large losses of inorganic nitrogen from tropical rainforests suggest a lack of nitrogen limitation. Ecology letters, 15(1), 9-16. 2) Houlton et al. 2007 A climate-driven switch in plant nitrogen acquisition within tropical forest communities. 3) Bai, E., and Houlton, B. Z. (2009). Coupled isotopic and process-based modeling…
USA	Maui, HI	Rainfall gradient (405 mm)	tropical	forest			4050	16	4050	17	15	35		-3.45	3.47			0.36		1) Brookshire, E. N. J., Gerber, S., Menge, D. N., & Hedin, L. O. (2012). Large losses of inorganic nitrogen from tropical rainforests suggest a lack of nitrogen limitation. Ecology letters, 15(1), 9-16. 2) Houlton et al. 2007 A climate-driven switch in plant nitrogen acquisition within tropical forest communities. 3) Bai, E., and Houlton, B. Z. (2009). Coupled isotopic and process-based modeling…
USA	Maui, HI	Rainfall gradient (500 mm)	tropical	forest			5000	16	5050	17	15			-5.65						1) Houlton, B. Z., Sigman, D. M., Schuur, E. A., & Hedin, L. O. (2007). A climate-driven switch in plant nitrogen acquisition within tropical forest communities. Proceedings of the National Academy of Sciences, 104(21), 8902-8906. 2) Houlton, B. Z., Sigman, D. M., & Hedin, L. O. (2006). Isotopic evidence for large gaseous nitrogen losses from tropical rainforests. Proceedings of the National Acad…
USA	Luquillo LTER, PR	Rio Icacos	tropical	forest	18.15’ N	65.50’ W	708	21	3750	3.6	20	200			4.8	0.21	4.06	1.86	0.67	1) Chestnut, T. J., and McDowell, W. H. (2000). C and N dynamics in the riparian and hyporheic zones of a tropical stream, Luquillo Mountains, Puerto Rico. Journal of the North American Benthological Society, 19(2), 199-214. 2) McDowell, W. H., and Asbury, C. E. (1994). Export of carbon, nitrogen, and major ions from three tropical montane watersheds. Limnology and Oceanography, 39(1), 111-125. 3…
USA	Luquillo LTER, PR	Quebrada Toronja	tropical	forest	18.15’ N	65.50’ W	388.5	22.8	3750	3.6	10				3.95				0.42	1) McDowell, W. H., and Asbury, C. E. (1994). Export of carbon, nitrogen, and major ions from three tropical montane watersheds. Limnology and Oceanography, 39(1), 111-125. 2) Collected soil.
USA	Luquillo LTER, PR	Bisley	tropical	forest	18.19' N	65.45' W	240	22.8	4250	3.6	10			-1.8	4.36				1.85	1) McDowell, W. H., Bowden, W. B., & Asbury, C. E. (1992). Riparian nitrogen dynamics in two geomorphologically distinct tropical rain forest watersheds: subsurface solute patterns. Biogeochemistry, 18(2), 53-75. 2) Stephen Porder (personal communication). 3) Collected soil.
USA	Luquillo LTER, PR	Quebrada Sonadora	tropical	forest	18.20' N	65.49' W	400	22.1	3460	3.6	25			-0.7	5.9				0.45	1) McDowell, W. H., and Asbury, C. E. (1994). Export of carbon, nitrogen, and major ions from three tropical montane watersheds. Limnology and Oceanography, 39(1), 111-125. 2) McDowell, W. H. (1998). Internal nutrient fluxes in a Puerto Rican rain forest. Journal of Tropical Ecology, 14(04), 521-536. 3) Hendrix, P. F., Lachnicht, S. L., Callaham, M. A., and Zou, X. (1999). Stable isotopic studies…
USA	Luquillo LTER, PR	Quebrada Pared	tropical	forest			342.5	22.5	1500	3.6	10				3.31				0.39	1) Potter, J. D., McDowell, W. H., Merriam, J. L., Peterson, B. J., and Thomas, S. M. (2010). Denitrification and total nitrate uptake in streams of a tropical landscape. Ecological Applications, 20(8), 2104-2115. 2) Collected soil.
USA	Caribou-Poker Creeks Research Watershed, AK	C2	boreal	forest	65.10' N	147.30' W	525	-3.5	487.5	0.3	10	30-50	buried-bag incubation				0.05	0.16	0.22	1) MAcLEAN, R. O. B. E. R. T., Oswood, M. W., Irons Iii, J. G., and McDowell, W. H. (1999). The effect of permafrost on stream biogeochemistry: a case study of two streams in the Alaskan (USA) taiga. Biogeochemistry, 47(3), 239-267. 2) Rohrs-Richey, J. K., and Mulder, C. P. (2007). Effects of local changes in active layer and soil climate on seasonal foliar nitrogen concentrations of three boreal…
USA	Caribou-Poker Creeks Research Watershed, AK	C3	boreal	forest	65.10' N	147.30' W	525	-3.5	487.5	0.3	10	30-50	buried-bag incubation				0.08	0.15	0.2	1) MAcLEAN, R. O. B. E. R. T., Oswood, M. W., Irons Iii, J. G., and McDowell, W. H. (1999). The effect of permafrost on stream biogeochemistry: a case study of two streams in the Alaskan (USA) taiga. Biogeochemistry, 47(3), 239-267. 2) Rohrs-Richey, J. K., and Mulder, C. P. (2007). Effects of local changes in active layer and soil climate on seasonal foliar nitrogen concentrations of three boreal…
USA	Glacier Bay, AK	Site 1	boreal	forest	58.58' N	136.4' W		0.5			mineral soil		buried-bag incubation	-4.46		0.02	0.04967			1) Hobbie, E. A., Macko, S. A., & Williams, M. (2000). Correlations between foliar δ15N and nitrogen concentrations may indicate plant-mycorrhizal interactions. Oecologia, 122(2), 273-283.
USA	Toolik Lake, AK	Imnavait Creek	boreal	grassland	68.37' N	149.18' W		-7	350	0.25	15	20			0.37			0.11		1) Yano, Y., Shaver, G. R., Giblin, A. E., Rastetter, E. B., & Nadelhoffer, K. J. (2010). Nitrogen dynamics in a small arctic watershed: retention and downhill movement of 15N. Ecological Monographs, 80(2), 331-351. 2) Yano, Y., Shaver, G. R., Giblin, A. E., & Rastetter, E. B. (2010). Depleted 15N in hydrolysable-N of arctic soils and its implication for mycorrhizal fungi–plant interaction. Bioge…
USA	Seattle, WA	Cedar River Watershed	temperate	forest				9.7	1460	2.5	10		buried-bag incubation			0.09	0.12			1) Barg, A. K., and Edmonds, R. L. (1999). Influence of partial cutting on site microclimate, soil nitrogen dynamics, and microbial biomass in Douglas-fir stands in western Washington. Canadian Journal of Forest Research, 29(6), 705-713.
USA	Wind River Experimental Forest, WA	Not specified	temperate	forest	45.49' N		625	8.7	2223	1.1	15	70-80			3.76			0.17		1) Binkley, D., Sollins, P., and McGiLL, W. B. (1985). Natural abundance of nitrogen-15 as a tool for tracing alder-fixed nitrogen. Soil Science Society of America Journal, 49(2), 444-447. 2) Binkley, D., Sollins, P., Bell, R., Sachs, D., and Myrold, D. (1992). Biogeochemistry of adjacent conifer and alder-conifer stands. Ecology, 73(6), 2022-2033.
USA	Cascade Head Experimental Forest, OR	Salmon River Watershed (Deer Creek sub-basin)	temperate	forest	45.03' N		180	15	2400	1.8	15	70-80	lab incubations		2.38		0.56	0.98		1) Binkley, D., and Hart, S. C. (1989). The components of nitrogen availability assessments in forest soils. In Advances in soil science (pp. 57-112). Springer New York. 2) Binkley, D., Sollins, P., and McGiLL, W. B. (1985). Natural abundance of nitrogen-15 as a tool for tracing alder-fixed nitrogen. Soil Science Society of America Journal, 49(2), 444-447. 3) Binkley, D., Sollins, P., Bell, R., S…
USA	Cascade Head Experimental Forest, OR	South Santiam River	temperate	forest				15	2400	1.8		100						0.58	2.3	1) Cairns, M. A., Lajtha, K., & Beedlow, P. A. (2009). Dissolved carbon and nitrogen losses from forests of the Oregon Cascades over a successional gradient. Plant and soil, 318(1-2), 185-196.
USA	Oregon Coast Range, OR	Yamhill River	temperate	forest	45.64' N	123.32' W	381	10.4	205.5	2	10	100		-1.845	3.47			0.43		1) Perakis, S. S., Sinkhorn, E. R., & Compton, J. E. (2011). δ15N constraints on long-term nitrogen balances in temperate forests. Oecologia, 167(3), 793-807. 2) Perakis, S. S., & Sinkhorn, E. R. (2011). Biogeochemistry of a temperate forest nitrogen gradient. Ecology, 92(7), 1481-1491.
USA	Oregon Coast Range, OR	Yaquina River	temperate	forest	44.36' N	123.50' W	221.333	11.2667	166.667	2	10	100		-1.01333	2.86667			1.24		1) Perakis, S. S., Sinkhorn, E. R., & Compton, J. E. (2011). δ15N constraints on long-term nitrogen balances in temperate forests. Oecologia, 167(3), 793-807. 2) Perakis, S. S., & Sinkhorn, E. R. (2011). Biogeochemistry of a temperate forest nitrogen gradient. Ecology, 92(7), 1481-1491.
USA	Oregon Coast Range, OR	Siletz River	temperate	forest	44.42' N	123.45' W	157.5	11.2	166.5	2	10	100		-1.49	2.74			8.31		1) Perakis, S. S., Sinkhorn, E. R., & Compton, J. E. (2011). δ15N constraints on long-term nitrogen balances in temperate forests. Oecologia, 167(3), 793-807. 2) Perakis, S. S., & Sinkhorn, E. R. (2011). Biogeochemistry of a temperate forest nitrogen gradient. Ecology, 92(7), 1481-1491.
USA	Oregon Coast Range, OR	Little Nestucca River	temperate	forest	45.10' N	123.55' W	115	11.2	169	2	10	100		-1.04	2.05			58.14		1) Perakis, S. S., Sinkhorn, E. R., & Compton, J. E. (2011). δ15N constraints on long-term nitrogen balances in temperate forests. Oecologia, 167(3), 793-807. 2) Perakis, S. S., & Sinkhorn, E. R. (2011). Biogeochemistry of a temperate forest nitrogen gradient. Ecology, 92(7), 1481-1491.
USA	Oregon Coast Range, OR	Nehalem River	temperate	forest	45.44' N	123.53' W	23	10.7	200	2	10	100		-0.7	2.99			8.91		1) Perakis, S. S., Sinkhorn, E. R., & Compton, J. E. (2011). δ15N constraints on long-term nitrogen balances in temperate forests. Oecologia, 167(3), 793-807. 2) Perakis, S. S., & Sinkhorn, E. R. (2011). Biogeochemistry of a temperate forest nitrogen gradient. Ecology, 92(7), 1481-1491.
USA	Substrate Age Gradient, AZ	Sunset Crater	temperate	forest	35.394' N	111.424' W	1905	12	328	4.2	15		lab incubation	-0.28	3.57		0.11			1) Selmants, P. C., and Hart, S. C. (2008). Substrate age and tree islands influence carbon and nitrogen dynamics across a retrogressive semiarid chronosequence. Global Biogeochemical Cycles, 22(1). 2) Coyle, J. S., Dijkstra, P., Doucett, R. R., Schwartz, E., Hart, S. C., and Hungate, B. A. (2009). Relationships between C and N availability, substrate age, and natural abundance 13 C and 15 N sign…
USA	Substrate Age Gradient, AZ	O'Neill Crater	temperate	forest	35.246' N	111.459' W	1941	11	352	4.2	15		lab incubation	0.01	4.57		0.48			1) Selmants, P. C., and Hart, S. C. (2008). Substrate age and tree islands influence carbon and nitrogen dynamics across a retrogressive semiarid chronosequence. Global Biogeochemical Cycles, 22(1). 2) Coyle, J. S., Dijkstra, P., Doucett, R. R., Schwartz, E., Hart, S. C., and Hungate, B. A. (2009). Relationships between C and N availability, substrate age, and natural abundance 13 C and 15 N sign…
USA	Substrate Age Gradient, AZ	Red Mountain	temperate	forest	35.538' N	111.867' W	2073	11	325	4.2	15		lab incubation	0.44	5.69		1.04			1) Selmants, P. C., and Hart, S. C. (2008). Substrate age and tree islands influence carbon and nitrogen dynamics across a retrogressive semiarid chronosequence. Global Biogeochemical Cycles, 22(1). 2) Coyle, J. S., Dijkstra, P., Doucett, R. R., Schwartz, E., Hart, S. C., and Hungate, B. A. (2009). Relationships between C and N availability, substrate age, and natural abundance 13 C and 15 N sign…
USA	Substrate Age Gradient, AZ	Cedar Mountain	temperate	forest	35.391' N	111.141' W	2073	11	338	4.2	15		lab incubation	1.64	6.93		0.72			1) Selmants, P. C., and Hart, S. C. (2008). Substrate age and tree islands influence carbon and nitrogen dynamics across a retrogressive semiarid chronosequence. Global Biogeochemical Cycles, 22(1). 2) Coyle, J. S., Dijkstra, P., Doucett, R. R., Schwartz, E., Hart, S. C., and Hungate, B. A. (2009). Relationships between C and N availability, substrate age, and natural abundance 13 C and 15 N sign…
USA	Canyonlands National Park, UT	Virginia Park	temperate	grassland				12.5	780	3.97	10		incubation	0.51	3.84	0.2	0.1			1) Evans, R. D., & Belnap, J. (1999). Long-term consequences of disturbance on nitrogen dynamics in an arid ecosystem. Ecology, 80(1), 150-160.
USA	University of Kansas Field Station and Ecological Reserves, KS	Not specified	temperate	grassland	39. N	94. W		12.9	900	6.17	15		incubation		1.7		0.08			1) Billings, S. A. (2006). Soil organic matter dynamics and land use change at a grassland/forest ecotone. Soil Biology and Biochemistry, 38(9), 2934-2943.
USA	Great Smokey Mountains National Park, TN	Little Pigeon River	temperate	forest			1340	13.6	1550	7.13	10		lab incubation	-1.5	4.5	1.74	5.5			1) Garten Jr, C. T., and Miegroet, H. V. (1994). Relationships between soil nitrogen dynamics and natural 15N abundance in plant foliage from Great Smoky Mountains National Park. Canadian Journal of Forest Research, 24(8), 1636-1645.
USA	Great Smokey Mountains National Park, TN	Roaring Fork	temperate	forest			850	13.6	1550	7.13	10		lab incubation	-1	4.8	2.98	4.68			1) Garten Jr, C. T., and Miegroet, H. V. (1994). Relationships between soil nitrogen dynamics and natural 15N abundance in plant foliage from Great Smoky Mountains National Park. Canadian Journal of Forest Research, 24(8), 1636-1645.
USA	Great Smokey Mountains National Park, TN	West Prong	temperate	forest			675	13.6	1550	7.13	10		lab incubation	-2.4	5.1	0.05	2.06			1) Garten Jr, C. T., and Miegroet, H. V. (1994). Relationships between soil nitrogen dynamics and natural 15N abundance in plant foliage from Great Smoky Mountains National Park. Canadian Journal of Forest Research, 24(8), 1636-1645.
USA	Great Smokey Mountains National Park, TN	Little River	temperate	forest			617.5	13.6	1550	7.13	10		lab incubation	-3.5	4.3	0.02	2.28			1) Garten Jr, C. T., and Miegroet, H. V. (1994). Relationships between soil nitrogen dynamics and natural 15N abundance in plant foliage from Great Smoky Mountains National Park. Canadian Journal of Forest Research, 24(8), 1636-1645.
USA	Great Smokey Mountains National Park, TN	Abrams Creek	temperate	forest			627.5	13.6	1550	7.13	10		lab incubation	-1.75	5.4	0.01	0.13			1) Garten Jr, C. T., and Miegroet, H. V. (1994). Relationships between soil nitrogen dynamics and natural 15N abundance in plant foliage from Great Smoky Mountains National Park. Canadian Journal of Forest Research, 24(8), 1636-1645.
USA	Oak Ridge National Environmental Research Park, TN	East Fork Walker Branch	temperate	forest	79.22' N	69.22' E		14.5	1350	13	7		lab incubation	-3.1	3.8	0.17	0.32			1) Garten, C. T. (1993). Variation in foliar 15N abundance and the availability of soil nitrogen on Walker Branch watershed. Ecology, 74(7), 2098-2113.
USA	Calhoun Forest, SC	Not specified	temperate	forest	34.5' N	82. W	200	16	1250	25	7.5			-3.21	2.46					1) Billings, S. A., & Richter, D. D. (2006). Changes in stable isotopic signatures of soil nitrogen and carbon during 40 years of forest development. Oecologia, 148(2), 325-333.
USA	Fernow Experimental Forest, WV	WS4	temperate	forest	39.3'15" N	79.42'15" W	810	8.9	1450	13	5		buried-bag incubation			0.15	0.17			1) Adams, M. B., Angradi, T. R., & Kochenderfer, J. N. (1997). Stream water and soil solution responses to 5 years of nitrogen and sulfur additions at the Fernow Experimental Forest, West Virginia. Forest Ecology and Management, 95(1), 79-91. 2) Gilliam, F. S., Yurish, B. M., & Adams, M. B. (1996). Ecosystem nutrient responses to chronic nitrogen inputs at Fernow Experimental Forest, West Virgini…
USA	Fernow Experimental Forest, WV	WS7	temperate	forest	39.03' N	79.49' W		8.9	1430	13	5		buried-bag incubation			0.15	0.17			1) Gilliam, F. S., Yurish, B. M., & Adams, M. B. (1996). Ecosystem nutrient responses to chronic nitrogen inputs at Fernow Experimental Forest, West Virginia. Canadian Journal of Forest Research, 26(2), 196-205.
USA	Buck Creek WS, NY	South Buck Creek	temperate	forest			660	5	1200	7	5		lab incubation			3.97	12.74			1) Ross, D. S., Lawrence, G. B., & Fredriksen, G. (2004). Mineralization and nitrification patterns at eight northeastern USA forested research sites. Forest Ecology and Management, 188(1), 317-335. 2) Ross, D. S., Shanley, J. B., Campbell, J. L., Lawrence, G. B., Bailey, S. W., Likens, G. E., ... & Jamison, A. E. (2012). Spatial patterns of soil nitrification and nitrate export from forested hea…
USA	Buck Creek WS, NY	North Buck Creek	temperate	forest			620	5	1200	7	5		lab incubation			1.75	12.3			1) Ross, D. S., Lawrence, G. B., & Fredriksen, G. (2004). Mineralization and nitrification patterns at eight northeastern USA forested research sites. Forest Ecology and Management, 188(1), 317-335. 2) Ross, D. S., Shanley, J. B., Campbell, J. L., Lawrence, G. B., Bailey, S. W., Likens, G. E., ... & Jamison, A. E. (2012). Spatial patterns of soil nitrification and nitrate export from forested hea…
USA	Adirondacks, NY	Woods Lake	temperate	forest	43.53' N	74.57' W	678	5	1100	13.13		50		0.55				2.64		1) Mitchell, M. J., Driscoll, C. T., Owen, J. S., Schaefer, D., Michener, R., & Raynal, D. J. (2001). Nitrogen biogeochemistry of three hardwood ecosystems in the Adirondack Region of New York. Biogeochemistry, 56(2), 93-133.
USA	Adirondacks, NY	Pancake-Hall Creek	temperate	forest	43.50' N	74.51' W	635	5	1250	7		50		-1.1	6.4			2.35		1) Mitchell, M. J., Driscoll, C. T., Owen, J. S., Schaefer, D., Michener, R., & Raynal, D. J. (2001). Nitrogen biogeochemistry of three hardwood ecosystems in the Adirondack Region of New York. Biogeochemistry, 56(2), 93-133. 2) Driscoll, C. T., Wyskowski, B. J., Cosentini, C. C., & Smith, M. E. (1987). Processes regulating temporal and longitudinal variations in the chemistry of a low-order wood…
USA	Adirondacks, NY	Huntington Forest	temperate	forest	43.59' N	74.14' W	530	4.4	1010	5.49		50		-0.57	6.7					1) Mitchell, M. J., Driscoll, C. T., Owen, J. S., Schaefer, D., Michener, R., & Raynal, D. J. (2001). Nitrogen biogeochemistry of three hardwood ecosystems in the Adirondack Region of New York. Biogeochemistry, 56(2), 93-133.
USA	Catskill Mountains, NY	Winnisook	temperate	forest	41.53' to 42.20' N	74.13' to 74.53 W	1144	4.3	1530	9.41	Oa or A horizon		field incubation			6.45	15.26		2.02	1) Ross, D. S., Shanley, J. B., Campbell, J. L., Lawrence, G. B., Bailey, S. W., Likens, G. E., ... & Jamison, A. E. (2012). Spatial patterns of soil nitrification and nitrate export from forested headwaters in the northeastern United States. Journal of Geophysical Research: Biogeosciences (2005–2012), 117(G1). 2) Lovett, G. M., Weathers, K. C., & Sobczak, W. V. (2000). Nitrogen saturation and re…
USA	Catskill Mountains, NY	Rondout Watershed	temperate	forest	41.53' to 42.20' N	74.13' to 74.53 W	1171	4.3	1530	11.2	12		lab incubation			2.32	8.76		1.62	1) Templer, P., Findlay, S., & Lovett, G. (2003). Soil microbial biomass and nitrogen transformations among five tree species of the Catskill Mountains, New York, USA. Soil Biology and Biochemistry, 35(4), 607-613. 2) Lovett, G. M., Weathers, K. C., & Sobczak, W. V. (2000). Nitrogen saturation and retention in forested watersheds of the Catskill Mountains, New York. Ecological Applications, 10(1)…
USA	Catskill Mountains, NY	Kanape Brook Watershed	temperate	forest	41.53' to 42.20' N	74.13' to 74.53 W	939	4.3	1530	11.2	12		lab incubation			0	6.04		0.68	1) Templer, P., Findlay, S., & Lovett, G. (2003). Soil microbial biomass and nitrogen transformations among five tree species of the Catskill Mountains, New York, USA. Soil Biology and Biochemistry, 35(4), 607-613. 2) Lovett, G. M., Weathers, K. C., & Sobczak, W. V. (2000). Nitrogen saturation and retention in forested watersheds of the Catskill Mountains, New York. Ecological Applications, 10(1)…
USA	Harvard Forest LTER, MA	Chronic Nitrgogen Addition sites (Pine)	temperate	forest	42.30' N	72.10' W		3.5	1120	8	10	60	buried-bag incubation	-1.8	3.4	0.01	0.01	0.04		1) Nadelhoffer, K. J., Colman, B. P., Currie, W. S., Magill, A., and Aber, J. D. (2004). Decadal-scale fates of 15N tracers added to oak and pine stands under ambient and elevated N inputs at the Harvard Forest (USA). Forest Ecology and Management, 196(1), 89-107. 2) Aber, J. D., Magill, A., Boone, R., Melillo, J. M., & Steudler, P. (1993). Plant and soil responses to chronic nitrogen additions a…
USA	Harvard Forest LTER, MA	Chronic Nitrgogen Addition (Hardwood) - Bigelow Brook	temperate	forest	42.30' N	72.10' W		3.5	1120	8	10	60	buried-bag incubation	-2.6	5.2	0	0.01	0.06	0.23	1) Nadelhoffer, K. J., Colman, B. P., Currie, W. S., Magill, A., and Aber, J. D. (2004). Decadal-scale fates of 15N tracers added to oak and pine stands under ambient and elevated N inputs at the Harvard Forest (USA). Forest Ecology and Management, 196(1), 89-107. 2) Aber, J. D., Magill, A., Boone, R., Melillo, J. M., & Steudler, P. (1993). Plant and soil responses to chronic nitrogen additions a…
USA	Hubbard Brook LTER, NH	Watershed 3	temperate	forest	43.56' N	71.45' W		5.6	1445	6.46	10-20		incubation		6.94	0.25				1) Pardo, L. H., Hemond, H. F., Montoya, J. P., & Pett-Ridge, J. (2007). Natural abundance 15 N in soil and litter across a nitrate-output gradient in New Hampshire. Forest Ecology and Management, 251(3), 217-230. 2) Bernhardt, E. S., Hall Jr, R. O., & Likens, G. E. (2002). Whole-system estimates of nitrification and nitrate uptake in streams of the Hubbard Brook Experimental Forest. Ecosystems, …
USA	Hubbard Brook LTER, NH	Watershed 5	temperate	forest				5.6	1445	6.46	Bs horizon			-1.46	6.37					1) Bernhardt, E. S., Hall Jr, R. O., & Likens, G. E. (2002). Whole-system estimates of nitrification and nitrate uptake in streams of the Hubbard Brook Experimental Forest. Ecosystems, 5(5), 419-430. 2) Pardo, L. H., Hemond, H. F., Montoya, J. P., Fahey, T. J., & Siccama, T. G. (2002). Response of the natural abundance of 15N in forest soils and foliage to high nitrate loss following clear-cuttin…
USA	Hubbard Brook LTER, NH	Watershed 6	temperate	forest	43.56' N	71.45' W	670	5.6	1400	6.72	B horizon	40-49	incubation	-1.38	7.7	1.05	2.3	0.27	0.3	1) Bohlen, P. J., Groffman, P. M., Driscoll, C. T., Fahey, T. J., & Siccama, T. G. (2001). Plant-soil-microbial interactions in a northern hardwood forest. Ecology, 82(4), 965-978. 2) Dittman, J. A., Driscoll, C. T., Groffman, P. M., & Fahey, T. J. (2007). Dynamics of nitrogen and dissolved organic carbon at the Hubbard Brook Experimental Forest. Ecology, 88(5), 1153-1166. 3) Webster, J. R., Mulh…
USA	Hubbard Brook LTER, NH	Watershed 7	temperate	forest	43.55' N	71.46' W	760	6.15	1490	6.15	Oa or A horizon		field incubation			2.35	7.36		1.08	1) Campbell, J. L., Hornbeck, J. W., McDowell, W. H., Buso, D. C., Shanley, J. B., and Likens, G. E. (2000). Dissolved organic nitrogen budgets for upland, forested ecosystems in New England. Biogeochemistry, 49(2), 123-142. 2) Ross, D. S., Shanley, J. B., Campbell, J. L., Lawrence, G. B., Bailey, S. W., Likens, G. E., ...and& Jamison, A. E. (2012). Spatial patterns of soil nitrification and nitr…
USA	White Mountains, NH	Cone Pond	temperate	forest	43.54'N	71.36'W	568	5.6	1495	5.53	10-20		field incubation	-2.32	7.39	0.44	1.14		0.28	1) Pardo, L. H., Hemond, H. F., Montoya, J. P., and Pett-Ridge, J. (2007). Natural abundance 15 N in soil and litter across a nitrate-output gradient in New Hampshire. Forest Ecology and Management, 251(3), 217-230. 2) Ross, D. S., Shanley, J. B., Campbell, J. L., Lawrence, G. B., Bailey, S. W., Likens, G. E., ... and Jamison, A. E. (2012). Spatial patterns of soil nitrification and nitrate expor…
USA	White Mountains, NH	The Bowl	temperate	forest	43.56' N	71.23' W		5.6	1495	6.46	10-20		incubation	-2.18	7.59	0.13				1) Pardo, L. H., Hemond, H. F., Montoya, J. P., and Pett-Ridge, J. (2007). Natural abundance 15 N in soil and litter across a nitrate-output gradient in New Hampshire. Forest Ecology and Management, 251(3), 217-230. 2) Martin, C. W. (1979). Precipitation and streamwater chemistry in an undisturbed forested watershed in New Hampshire. Ecology, 36-42.
USA	Lye Brook Wilderness, VT	Lye Brook watershed	temperate	forest	43.07' N	73.02' W	775	11	1150	10	B horizon	B horizon	buried-bag incubation		6.2	4.03	9.38	1.33	0.93	1) Ross, D. S., Shanley, J. B., Campbell, J. L., Lawrence, G. B., Bailey, S. W., Likens, G. E., ... and Jamison, A. E. (2012). 2) Campbell, J. L., Eagar, C., McDowell, W. H., & Hornbeck, J. W. (2000). Analysis of nitrogen dynamics in the Lye Brook Wilderness area, Vermont, USA. Water, air, and soil pollution, 122(1-2), 63-75.
USA	Lye Brook Wilderness, VT	Ranch Brook watershed	temperate	forest			759	11	1150	7.17	Oa or A horizon	export	incubation			0.61	1.05	2.96	0.41	1) Ross, D. S., Shanley, J. B., Campbell, J. L., Lawrence, G. B., Bailey, S. W., Likens, G. E., ... and Jamison, A. E. (2012). Spatial patterns of soil nitrification and nitrate export from forested headwaters in the northeastern United States. Journal of Geophysical Research: Biogeosciences (2005–2012), 117(G1).
USA	Walden, VT	Sleepers River W9-A	temperate	forest			636	6	1100	8.56	Oa or A horizon		incubation			5.01	10.22		3	1) Ross, D. S., Shanley, J. B., Campbell, J. L., Lawrence, G. B., Bailey, S. W., Likens, G. E., ... and Jamison, A. E. (2012). Spatial patterns of soil nitrification and nitrate export from forested headwaters in the northeastern United States. Journal of Geophysical Research: Biogeosciences (2005–2012), 117(G1).
USA	Brush Brook, VT	D	temperate	forest			841	6	1130	7.37	Oa or A horizon		incubation			6.32	10.12			1) Ross, D. S., Shanley, J. B., Campbell, J. L., Lawrence, G. B., Bailey, S. W., Likens, G. E., ... and Jamison, A. E. (2012). Spatial patterns of soil nitrification and nitrate export from forested headwaters in the northeastern United States. Journal of Geophysical Research: Biogeosciences (2005–2012), 117(G1).
USA	Brush Brook, VT	G	temperate	forest			839	6	1130	7.37	Oa or A horizon		incubation			6.56	7.97			1) Ross, D. S., Shanley, J. B., Campbell, J. L., Lawrence, G. B., Bailey, S. W., Likens, G. E., ... and Jamison, A. E. (2012). Spatial patterns of soil nitrification and nitrate export from forested headwaters in the northeastern United States. Journal of Geophysical Research: Biogeosciences (2005–2012), 117(G1).
USA	Bear Brook Watershed, Maine	Southeast-facing slope of Lead Mountain	temperate	forest	44.51'55" N	68.6'25" W	260	4.34	1320	4	5		buried-bag incubation	-1.67	5.85	0.17	0.58			1) Magill, A. H., Downs, M. R., Nadelhoffer, K. J., Hallett, R. A., & Aber, J. D. (1996). Forest ecosystem response to four years of chronic nitrate and sulfate additions at Bear Brooks Watershed, Maine, USA. Forest Ecology and Management, 84(1), 29-37. 2) Nadelhoffer, K. J., Downs, M. R., Fry, B., Aber, J. D., Magill, A. H., & Melillo, J. M. (1995). The fate of 15N-labelled nitrate additions to …
