# Supplementary material for: Reviews and syntheses: measuring ecosystem nitrogen status – a comparison of proxies
Source: Copernicus journal article supplement (doi:10.5194/bg-13-5395-2016), 2016-09-28
Supplement: Supplementary file [file bg-13-5395-2016-supplement-title-page.pdf › bg-13-5395-2016-supplement-title-page.pdf]

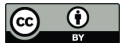

## *Supplement of*

# **Reviews and syntheses: measuring ecosystem nitrogen status – a comparison of proxies**

**Maya Almaraz and Stephen Porder**

*Correspondence to:* Maya Almaraz ([maya\\_almaraz@brown.edu](mailto:maya_almaraz@brown.edu))

- [bg-13-5395-2016-supplement-title-page.pdf](#)
- [Supplemental Data.xlsx](#)

The copyright of individual parts of the supplement might differ from the CC-BY 3.0 licence.
